# Supplementary material
Source: publisher figshare collection journal article supplement (https://asha.figshare.com/articles/dataset/_/11368106)
Supplement: Supplementary file 1 [file 1]

## Supplemental Material S7

### Experiment 2 - Coefficients of the best fitting model for the subgroup of CI users for fixations towards the semantic competitor

*Semantic Competitor Fixations* ~  
*Condition* · *CVC* · (*linear* + *quadratic* + *cubic* + *quartic*) +  
*Condition* · *d'* · (*linear* + *quadratic* + *cubic* + *quartic*) +  
(*linear* + *quadratic* + *cubic* + *quartic* | *participant*)

| Fixed Effects            |          |            |         |          |
|--------------------------|----------|------------|---------|----------|
|                          | Estimate | Std. Error | z value | Pr(> z ) |
| (Intercept)              | -2.24    | 0.13       | -17.93  | 0.00     |
| linear                   | -8.71    | 2.90       | -3.00   | 0.00     |
| quadratic                | 8.14     | 3.02       | 2.70    | 0.01     |
| cubic                    | -0.16    | 2.47       | -0.07   | 0.95     |
| quartic                  | -3.40    | 1.47       | -2.31   | 0.02     |
| d'                       | 0.11     | 0.08       | 1.42    | 0.16     |
| cond_c                   | -0.19    | 0.04       | -5.30   | 0.00     |
| CVC                      | -0.00    | 0.01       | -0.63   | 0.53     |
| linear : d'              | 3.12     | 1.81       | 1.73    | 0.08     |
| quadratic : d'           | 2.91     | 1.88       | 1.55    | 0.12     |
| cubic : d'               | 0.52     | 1.54       | 0.34    | 0.74     |
| quartic : d'             | -0.41    | 0.92       | -0.45   | 0.65     |
| linear : cond_c          | -4.82    | 0.65       | -7.48   | 0.00     |
| quadratic : cond_c       | 1.16     | 0.71       | 1.63    | 0.10     |
| cubic : cond_c           | 3.35     | 0.68       | 4.89    | 0.00     |
| quartic : cond_c         | 1.30     | 0.66       | 1.97    | 0.05     |
| d' : cond_c              | -0.33    | 0.02       | -14.79  | 0.00     |
| linear : CVC             | -0.18    | 0.16       | -1.12   | 0.26     |
| quadratic : CVC          | -0.02    | 0.16       | -0.13   | 0.90     |
| cubic : CVC              | -0.27    | 0.13       | -2.04   | 0.04     |
| quartic : CVC            | -0.26    | 0.08       | -3.26   | 0.00     |
| cond_c : CVC             | -0.00    | 0.00       | -1.07   | 0.29     |
| linear : d' : cond_c     | -3.61    | 0.41       | -8.82   | 0.00     |
| quadratic : d' : cond_c  | -0.28    | 0.45       | -0.62   | 0.54     |
| cubic : d' : cond_c      | 0.62     | 0.43       | 1.43    | 0.15     |
| quartic : d' : cond_c    | 0.62     | 0.41       | 1.50    | 0.13     |
| linear : CVC : cond_c    | 0.11     | 0.04       | 2.94    | 0.00     |
| quadratic : CVC : cond_c | 0.24     | 0.04       | 6.18    | 0.00     |
| cubic : CVC : cond_c     | 0.24     | 0.04       | 6.37    | 0.00     |
| quartic : d' : cond_c    | 0.22     | 0.04       | 6.23    | 0.00     |

| Random Effects      |             |          |          |
|---------------------|-------------|----------|----------|
| Groups              | Name        | Variance | Std.Dev. |
| Participant         | (Intercept) | 0.04043  | 0.2011   |
|                     | linear      | 22.09557 | 4.7006   |
|                     | quadratic   | 23.75876 | 4.8743   |
|                     | cubic       | 15.73102 | 3.9662   |
|                     | quartic     | 5.21108  | 2.2828   |
| Observations        | 175,502     |          |          |
| Log Likelihood      | -57,989.310 |          |          |
| Akaike Inf. Crit.   | 116,068.600 |          |          |
| Bayesian Inf. Crit. | 116,522.000 |          |          |
