# Supplementary material
Source: publisher figshare collection journal article supplement (https://asha.figshare.com/articles/dataset/_/11368106)
Supplement: Supplementary file 2 [file 1]

# Supplemental Material S1

## Word and nonword characteristics of experiment 1 stimuli

| Stimuli Class             | Words    | Phonological Transcription | Length (phonemes) | Length (syllables) | Lexical Neighbors | Frequency (per million) |
|---------------------------|----------|----------------------------|-------------------|--------------------|-------------------|-------------------------|
| High Frequency            | kaart    | k.a3.r.t                   | 4                 | 1                  | 20                | 79.67                   |
| High Neighborhood Density | reis     | r.Ei.s                     | 3                 | 1                  | 28                | 90.37                   |
|                           | hart     | h.a.r.t                    | 4                 | 1                  | 22                | 126.53                  |
|                           | schat    | s.x.a.t                    | 4                 | 1                  | 17                | 264.03                  |
|                           | kop      | k.O.p                      | 3                 | 1                  | 24                | 229.23                  |
|                           | boeken   | b.u.k.5.n                  | 5                 | 2                  | 17                | 66.91                   |
|                           | teken    | t.eI.k.5.n                 | 5                 | 2                  | 16                | 76.36                   |
|                           | wagen    | v0.a3.G.5.n                | 5                 | 2                  | 15                | 77.82                   |
|                           | weken    | v0.eI.k.5.n                | 5                 | 2                  | 15                | 148.29                  |
|                           | dagen    | d.a3.G.5.n                 | 5                 | 2                  | 15                | 290.15                  |
|                           | leven    | l.eI.v.5.n                 | 5                 | 2                  | 20                | 1045.27                 |
| High Frequency            | helpt    | h.EI.f.t                   | 5                 | 1                  | 3                 | 65.68                   |
| Low Neighborhood Density  | brief    | b.r.i.f                    | 4                 | 1                  | 2                 | 73.84                   |
|                           | auto     | Vu.t.oU                    | 3                 | 1                  | 2                 | 457.99                  |
|                           | grond    | G.r.O.n.t                  | 5                 | 1                  | 5                 | 110.25                  |
|                           | zorg     | z.O.r.x                    | 4                 | 1                  | 2                 | 218.82                  |
|                           | vriend   | v.r.i.n.t                  | 5                 | 1                  | 2                 | 491.43                  |
|                           | vreemde  | v.r.eI.m.d.5               | 5                 | 2                  | 5                 | 62.11                   |
|                           | bedrijf  | b.5.d.r.Ei.f               | 6                 | 2                  | 3                 | 73.38                   |
|                           | gezin    | G.5.z.I.n                  | 5                 | 2                  | 5                 | 79.85                   |
|                           | hotel    | h.oU.t.E.l                 | 5                 | 2                  | 1                 | 88.73                   |
|                           | kerel    | k.I.r0.r.l                 | 5                 | 2                  | 5                 | 139.68                  |
|                           | agent    | a3.G.E.n.t                 | 5                 | 2                  | 1                 | 185.58                  |
|                           | probleem | p.r.O.b.l.eI.m             | 7                 | 2                  | 0                 | 341.78                  |
| Low Frequency             | kous     | k.Vu.s                     | 3                 | 1                  | 16                | 2.24                    |
| High Neighborhood Density | krat     | k.r.a.t                    | 4                 | 1                  | 19                | 3.82                    |
|                           | boog     | b.oU.x                     | 3                 | 1                  | 18                | 8.55                    |
|                           | daad     | d.a3.t                     | 3                 | 1                  | 30                | 16.65                   |
|                           | rand     | r.a.n.t                    | 4                 | 1                  | 23                | 19.12                   |
|                           | hof      | h.O.f                      | 3                 | 1                  | 16                | 23.19                   |
|                           | palen    | p.a3.l.5.n                 | 5                 | 2                  | 19                | 1.99                    |
|                           | kaken    | k.a3.k.5.n                 | 5                 | 2                  | 17                | 2.61                    |
|                           | lappen   | l.a.p.5.n                  | 6                 | 2                  | 16                | 3.86                    |
|                           | haven    | h.a3.v.5.n                 | 6                 | 2                  | 22                | 17.08                   |
|                           | wetten   | v0.E.t.5.n                 | 5                 | 2                  | 15                | 18.07                   |
|                           | leden    | .eI.d.5.n                  | 5                 | 2                  | 22                | 20.67                   |
|                           | regen    | r.eI.G.5.n                 | 5                 | 2                  | 15                | 26.48                   |
| Low Frequency             | slijm    | s.l.Ei.m                   | 4                 | 1                  | 5                 | 3.06                    |
| Low Neighborhood Density  | deugd    | d.9.x.t                    | 4                 | 1                  | 5                 | 6.43                    |
|                           | knie     | k.n.i                      | 3                 | 1                  | 3                 | 10.24                   |
|                           | pols     | p.O.l.s                    | 4                 | 1                  | 5                 | 13.65                   |
|                           | markt    | m.a.r.k.t                  | 5                 | 1                  | 2                 | 19.03                   |
|                           | sprong   | s.p.r.O.N                  | 5                 | 1                  | 1                 | 24.17                   |
|                           | sloffen  | s.l.O.f.5.n                | 6                 | 2                  | 2                 | 1.14                    |
|                           | refrein  | r.E.f.r.Ei.n               | 6                 | 2                  | 0                 | 1.14                    |
|                           | tennis   | t.E.n.i.s                  | 5                 | 2                  | 3                 | 4.64                    |
|                           | kritiek  | k.r.i.t.i.k                | 6                 | 2                  | 2                 | 9.95                    |
|                           | tapijt   | t.a3.p.Ei.t                | 5                 | 2                  | 0                 | 10.77                   |
|                           | handel   | h.a.n.d.5.l                | 6                 | 2                  | 5                 | 26.05                   |
|                           | verdriet | v.5.r.d.r.i.t              | 7                 | 2                  | 1                 | 26.48                   |

| Stimuli Class             | Nonwords | Phonological Transcription | Length (phonemes) | Length (syllables) | Lexical Neighbors | Frequency (per million) |
|---------------------------|----------|----------------------------|-------------------|--------------------|-------------------|-------------------------|
| High Frequency            | deg      | d.E.x                      | 3                 | 1                  | 18                | 206.24                  |
| High Neighborhood Density | mas      | m.A.s.                     | 3                 | 1                  | 36                | 245.89                  |
|                           | stot     | s.t.O.t                    | 4                 | 1                  | 21                | 135.79                  |
|                           | meeek    | m.eI.k                     | 3                 | 1                  | 15                | 175.49                  |
|                           | moos     | m.oU.s                     | 3                 | 1                  | 21                | 63.90                   |
|                           | vaken    | v.a3.k.5.n                 | 5                 | 2                  | 17                | 77.89                   |
|                           | zekken   | z.E.k.5.n                  | 5                 | 2                  | 16                | 112.83                  |
|                           | taren    | t.a3.r.5.n                 | 5                 | 2                  | 16                | 58.31                   |
|                           | saren    | s.a3.r.5.n                 | 5                 | 2                  | 15                | 85.89                   |
|                           | welen    | v0.eI.l.5.n                | 5                 | 2                  | 17                | 122.56                  |
|                           | lapen    | l.a3.p.5.n                 | 5                 | 2                  | 15                | 130.96                  |
| High Frequency            | slans    | s.l.a.N.s                  | 5                 | 1                  | 3                 | 65.01                   |
| Low Neighborhood Density  | gelm     | G.E.l.m                    | 4                 | 1                  | 3                 | 277.02                  |
|                           | klaan    | k.l.a3.n                   | 4                 | 1                  | 5                 | 133.43                  |
|                           | kwaas    | k.v0.a3.m                  | 4                 | 1                  | 5                 | 128.07                  |
|                           | storp    | s.t.O.r.p                  | 5                 | 1                  | 4                 | 86.36                   |
|                           | kneer    | k.n.I.r0.r                 | 5                 | 1                  | 4                 | 238.15                  |
|                           | tensen   | t.E.n.s.5.n                | 6                 | 2                  | 4                 | 281.03                  |
|                           | trafel   | t.r.a3.f.5.l               | 6                 | 2                  | 1                 | 83.39                   |
|                           | menten   | m.E.n.t.5.n                | 6                 | 2                  | 5                 | 221.01                  |
|                           | koemer   | k.u.m.5.r                  | 5                 | 2                  | 3                 | 92.43                   |
|                           | pleven   | p.l.eI.v.5.n               | 6                 | 2                  | 4                 | 271.41                  |
|                           | klaten   | k.l.a3.t.5.n               | 6                 | 2                  | 5                 | 269.41                  |
|                           | gonder   | x.O.n.d.5.r                | 6                 | 2                  | 4                 | 265.59                  |
| Low Frequency             | baag     | b.a3.x                     | 3                 | 1                  | 18                | 27.12                   |
| High Neighborhood Density | roeg     | r.u.x                      | 3                 | 1                  | 19                | 27.21                   |
|                           | kraat    | k.r.a3.t                   | 4                 | 1                  | 23                | 24.08                   |
|                           | koes     | k.u.s                      | 3                 | 1                  | 20                | 14.12                   |
|                           | res      | r.5.s                      | 3                 | 1                  | 16                | 29.69                   |
|                           | tar      | t.a.r                      | 3                 | 1                  | 15                | 11.68                   |
|                           | tekken   | t.E.k.5.n                  | 5                 | 2                  | 15                | 16.21                   |
|                           | seren    | s.I.r0.r.n                 | 5                 | 2                  | 19                | 25.78                   |
|                           | pelen    | p.eI.l.5.n                 | 5                 | 2                  | 16                | 25.84                   |
|                           | massen   | m.a.s.5.n                  | 5                 | 2                  | 19                | 30.23                   |
|                           | kagen    | k.a3.G.5.n                 | 5                 | 2                  | 15                | 34.82                   |
|                           | ralen    | r.a3.l.5.n                 | 5                 | 2                  | 22                | 26.58                   |
|                           | zanen    | z.a3.n.5.n                 | 5                 | 2                  | 16                | 22.53                   |
| Low Frequency             | kloem    | k.l.u.m                    | 4                 | 1                  | 5                 | 7.91                    |
| Low Neighborhood Density  | proen    | p.r.u.n                    | 4                 | 1                  | 3                 | 20.07                   |
|                           | tiest    | t.i.s.t                    | 4                 | 1                  | 5                 | 16.85                   |
|                           | boens    | b.u.n.s                    | 4                 | 1                  | 1                 | 3.13                    |
|                           | spalt    | s.p.A.l.t                  | 5                 | 1                  | 4                 | 23.07                   |
|                           | suin     | s.9y.n                     | 3                 | 1                  | 4                 | 11.86                   |
|                           | garren   | x.a.r.r.5.n                | 6                 | 2                  | 4                 | 3.79                    |
|                           | gormel   | G.O.r.m.5.l                | 6                 | 2                  | 2                 | 6.19                    |
|                           | kleinter | v.a.n.t.                   | 7                 | 2                  | 1                 | 14.36                   |
|                           | kruiter  | k.r.9y.t.5.r               | 6                 | 2                  | 4                 | 1.85                    |
|                           | neelden  | n.eI.l.d.5.n               | 6                 | 2                  | 3                 | 11.09                   |
|                           | lantser  | l.a.n.t.s.5.r              | 7                 | 2                  | 1                 | 2.08                    |
|                           | stasen   | s.t.a3.s.5.n               | 6                 | 2                  | 5                 | 8.42                    |
