# Supplementary material
Source: publisher figshare collection journal article supplement (https://asha.figshare.com/articles/dataset/_/11368106)
Supplement: Supplementary file 3 [file 1]

## Supplemental Material S5

### Experiment 2 - Coefficients of the best fitting model for fixations towards the semantic competitor

*Semantic Competitor Fixations* ~  
*Condition* · *Group* · (*linear* + *quadratic* + *cubic* + *quartic*) +  
*Condition* · *d'* · (*linear* + *quadratic* + *cubic* + *quartic*) +  
(*linear* + *quadratic* + *cubic* + *quartic* | *participant*)

| Fixed Effects                 |          |            |         |          |
|-------------------------------|----------|------------|---------|----------|
|                               | Estimate | Std. Error | z value | Pr(> z ) |
| (Intercept)                   | -3.04    | 0.19       | -15.82  | 0.00     |
| linear                        | -9.53    | 3.49       | -2.73   | 0.01     |
| quadratic                     | -0.71    | 3.16       | -0.22   | 0.82     |
| cubic                         | 4.04     | 1.97       | 2.05    | 0.04     |
| quartic                       | -1.79    | 1.57       | -1.14   | 0.25     |
| d'                            | 0.00     | 0.13       | 0.03    | 0.98     |
| cond_c                        | 0.36     | 0.03       | 13.74   | 0.00     |
| group_CI                      | 0.65     | 0.35       | 1.88    | 0.06     |
| linear : d'                   | -0.96    | 2.33       | -0.41   | 0.68     |
| quadratic : d'                | 1.81     | 2.11       | 0.86    | 0.39     |
| cubic : d'                    | -0.48    | 1.31       | -0.37   | 0.71     |
| quartic : d'                  | -0.04    | 1.04       | -0.04   | 0.97     |
| linear : cond_c               | 2.86     | 0.49       | 5.81    | 0.00     |
| quadratic : cond_c            | 2.49     | 0.54       | 4.64    | 0.00     |
| cubic : cond_c                | -4.65    | 0.52       | -8.93   | 0.00     |
| quartic : cond_c              | 0.60     | 0.51       | 1.17    | 0.24     |
| d' : cond_c                   | -0.26    | 0.02       | -14.80  | 0.00     |
| linear : group_CI             | -2.07    | 6.28       | -0.33   | 0.74     |
| quadratic : group_CI          | 7.02     | 5.67       | 1.24    | 0.22     |
| cubic : group_CI              | -4.94    | 3.53       | -1.40   | 0.16     |
| quartic : group_CI            | -0.41    | 2.82       | -0.15   | 0.88     |
| cond_c : group_CI             | -0.56    | 0.05       | -11.90  | 0.00     |
| linear : d' : cond_c          | -3.04    | 0.32       | -9.50   | 0.00     |
| quadratic : d' : cond_c       | 3.61     | 0.36       | 10.02   | 0.00     |
| cubic : d' : cond_c           | 0.25     | 0.34       | 0.73    | 0.46     |
| quartic : d' : cond_c         | -1.98    | 0.33       | -5.98   | 0.00     |
| linear : cond_c : group_CI    | -10.56   | 0.86       | -12.32  | 0.00     |
| quadratic : cond_c : group_CI | 4.29     | 0.97       | 4.43    | 0.00     |
| cubic : cond_c : group_CI     | 6.64     | 0.92       | 7.20    | 0.00     |
| quartic : cond_c : group_CI   | -4.04    | 0.90       | -4.49   | 0.00     |

| Random Effects      |              |          |          |
|---------------------|--------------|----------|----------|
| Groups              | Name         | Variance | Std.Dev. |
| Participant         | (Intercept)  | 0.1882   | 0.4338   |
|                     | linear       | 61.7814  | 7.8601   |
|                     | quadratic    | 50.2049  | 7.0855   |
|                     | cubic        | 18.9649  | 4.3549   |
|                     | quartic      | 11.8848  | 3.4474   |
| Observations        | 525,635      |          |          |
| Log Likelihood      | -119,043.800 |          |          |
| Akaike Inf. Crit.   | 238,177.500  |          |          |
| Bayesian Inf. Crit. | 238,680.300  |          |          |
