# Supplementary material
Source: publisher figshare collection journal article supplement (https://asha.figshare.com/articles/dataset/_/11368106)
Supplement: Supplementary file 4 [file 1]

## Supplemental Material S6

### Experiment 2 - Coefficients of the best fitting model for the subgroup of CI users for fixations towards the phonological competitor

*Phonological Competitor Fixations* ~  
*Condition · CVC · (linear + quadratic + cubic + quartic) +*  
*Condition · d' · (linear + quadratic + cubic + quartic) +*  
*(linear + quadratic + cubic + quartic | participant)*

| Fixed Effects            |          |            |         |          |
|--------------------------|----------|------------|---------|----------|
|                          | Estimate | Std. Error | z value | Pr(> z ) |
| (Intercept)              | -2.63    | 0.25       | -10.33  | 0.00     |
| linear                   | -12.30   | 4.66       | -2.64   | 0.01     |
| quadratic                | 8.44     | 3.00       | 2.81    | 0.00     |
| cubic                    | 2.85     | 3.46       | 0.82    | 0.41     |
| quartic                  | -4.96    | 2.82       | -1.76   | 0.08     |
| d'                       | -0.21    | 0.16       | -1.30   | 0.19     |
| cond_c                   | -0.29    | 0.04       | -7.48   | 0.00     |
| CVC                      | 0.02     | 0.01       | 1.65    | 0.10     |
| linear : d'              | -0.21    | 2.90       | -0.07   | 0.94     |
| quadratic : d'           | 4.55     | 1.86       | 2.44    | 0.01     |
| cubic : d'               | 0.29     | 2.15       | 0.14    | 0.89     |
| quartic : d'             | -0.99    | 1.75       | -0.57   | 0.57     |
| linear : cond_c          | -7.45    | 0.72       | -10.37  | 0.00     |
| quadratic : cond_c       | -0.24    | 0.74       | -0.32   | 0.75     |
| cubic : cond_c           | 6.95     | 0.72       | 9.58    | 0.00     |
| quartic : cond_c         | 5.56     | 0.70       | 7.99    | 0.00     |
| d' : cond_c              | 0.11     | 0.02       | 4.96    | 0.00     |
| linear : CVC             | -0.17    | 0.25       | -0.67   | 0.50     |
| quadratic : CVC          | -0.31    | 0.16       | -1.92   | 0.05     |
| cubic : CVC              | -0.07    | 0.19       | -0.36   | 0.72     |
| quartic : CVC            | 0.02     | 0.15       | 0.15    | 0.88     |
| cond_c : CVC             | 0.01     | 0.00       | 5.45    | 0.00     |
| linear : d' : cond_c     | -1.54    | 0.43       | -3.61   | 0.00     |
| quadratic : d' : cond_c  | 1.71     | 0.45       | 3.84    | 0.00     |
| cubic : d' : cond_c      | 3.88     | 0.43       | 8.96    | 0.00     |
| quartic : d' : cond_c    | 0.17     | 0.42       | 0.40    | 0.69     |
| linear : CVC : cond_c    | 0.64     | 0.05       | 13.76   | 0.00     |
| quadratic : CVC : cond_c | 0.26     | 0.04       | 5.98    | 0.00     |
| cubic : CVC : cond_c     | -0.53    | 0.04       | -11.88  | 0.00     |
| quartic : CVC : cond_c   | -0.29    | 0.04       | -6.85   | 0.00     |

| Random Effects      |             |          |          |
|---------------------|-------------|----------|----------|
| Groups              | Name        | Variance | Std.Dev. |
| Participant         | (Intercept) | 0.1714   | 0.414    |
|                     | linear      | 57.6032  | 7.590    |
|                     | quadratic   | 23.3659  | 4.834    |
|                     | cubic       | 31.3174  | 5.596    |
|                     | quartic     | 20.5537  | 4.534    |
| Observations        | 175,502     |          |          |
| Log Likelihood      | -51,776.870 |          |          |
| Akaike Inf. Crit.   | 103,643.700 |          |          |
| Bayesian Inf. Crit. | 104,097.100 |          |          |
