# Supplementary material
Source: publisher figshare collection journal article supplement (https://asha.figshare.com/articles/dataset/_/11368106)
Supplement: Supplementary file 5 [file 1]

## Supplemental Material S2

### Experiment 1 - Coefficients of the best fitting model for accuracy scores

$Accuracy \sim Stimulus\ Type \cdot Frequency + Group + Neighborhood\ Density$   
 $+ (1 | participant) + (1 | item)$

| Fixed Effects                               |             |            |          |
|---------------------------------------------|-------------|------------|----------|
|                                             | Estimate    | Std. Error | z value  |
| (Intercept)                                 | 5.28***     | 0.33       | 15.90    |
| StimulusType_nonword                        | -1.71***    | 0.22       | -7.92    |
| Frequency_centered_log                      | 0.26        | 0.15       | 1.73     |
| GroupCI                                     | -2.90***    | 0.34       | -8.53    |
| NeighborhoodDensity_centered                | -0.22*      | 0.10       | -2.14    |
| StimulusType_nonword:Frequency_centered_log | -0.45*      | 0.21       | -2.12    |
| Random Effects                              |             |            |          |
| Groups                                      | Name        | Variance   | Std.Dev. |
| Participant                                 | (Intercept) | 0.5282     | 0.7268   |
| Item                                        | (Intercept) | 0.6280     | 0.7925   |
| Observations                                | 2,900       |            |          |
| Log Likelihood                              | -876.4      |            |          |
| Akaike Inf. Crit.                           | 1,768.7     |            |          |
| Bayesian Inf. Crit.                         | 1,816.5     |            |          |

Note: \*p<0.1; \*\*p<0.05; \*\*\*p<0.01
