# Supplementary material
Source: publisher figshare collection journal article supplement (https://asha.figshare.com/articles/dataset/_/11368106)
Supplement: Supplementary file 6 [file 1]

## Supplemental Material S3

### Experiment 1 - Coefficients of the best fitting model for reaction times

$Reaction\ Times \sim Group \cdot Stimulus\ Type + Neighborhood\ Density + Frequency$   
 $+ (1 | participant) + (1 | item)$

| Fixed Effects                 |          |            |         |
|-------------------------------|----------|------------|---------|
|                               | Estimate | Std. Error | t value |
| (Intercept)                   | 0.62***  | 0.08       | -8.22   |
| Group_CI                      | 0.32***  | 0.10       | 3.08    |
| StimulusType_nonword          | 0.35***  | 0.03       | 10.91   |
| NeighborhoodDensity_centered  | 0.07***  | 0.01       | 4.65    |
| Frequency_centered_log        | -0.05*** | 0.01       | -3.67   |
| Group_CI:StimulusType_nonword | 0.23***  | 0.04       | 6.57    |

  

| Random Effects |             |          |          |
|----------------|-------------|----------|----------|
| Groups         | Name        | Variance | Std.Dev. |
| Participant    | (Intercept) | 0.07329  | 0.2707   |
| Item           | (Intercept) | 0.01240  | 0.1113   |
| Residual       |             | 0.17910  | 0.4232   |

  

|                     |            |
|---------------------|------------|
| Observations        | 2,402      |
| Log Likelihood      | -1,442.365 |
| Akaike Inf. Crit.   | 2,902.730  |
| Bayesian Inf. Crit. | 2,954.787  |

Note: \*p<0.1; \*\*p<0.05; \*\*\*p<0.01
