# Supplementary material
Source: publisher figshare collection journal article supplement (https://asha.figshare.com/articles/dataset/_/11368106)
Supplement: Supplementary file 7 [file 1]

## Supplemental Material S4

### Experiment 2 - Coefficients of the best fitting model for fixations towards the phonological competitor

*Phonological Competitor Fixations* ~  
*Condition* · *Group* · (*linear* + *quadratic* + *cubic* + *quartic*) +  
*Condition* · *d'* · (*linear* + *quadratic* + *cubic* + *quartic*) +  
(*linear* + *quadratic* + *cubic* + *quartic* | *participant*)

| Fixed Effects                 |          |            |         |          |  |
|-------------------------------|----------|------------|---------|----------|--|
|                               | Estimate | Std. Error | z value | Pr(> z ) |  |
| (Intercept)                   | -3.45    | 0.53       | -6.51   | 0.00     |  |
| linear                        | -22.92   | 9.54       | -2.40   | 0.02     |  |
| quadratic                     | 0.73     | 5.65       | 0.13    | 0.90     |  |
| cubic                         | -0.54    | 4.96       | -0.11   | 0.91     |  |
| quartic                       | -4.04    | 2.58       | -1.56   | 0.12     |  |
| d'                            | -0.65    | 0.35       | -1.83   | 0.07     |  |
| cond_c                        | -0.54    | 0.03       | -17.12  | 0.00     |  |
| group_CI                      | 0.33     | 0.95       | 0.35    | 0.73     |  |
| linear : d'                   | -10.64   | 6.39       | -1.66   | 0.10     |  |
| quadratic : d'                | 1.60     | 3.79       | 0.42    | 0.67     |  |
| cubic : d'                    | 0.66     | 3.31       | 0.20    | 0.84     |  |
| quartic : d'                  | -2.10    | 1.73       | -1.21   | 0.22     |  |
| linear : cond_c               | 2.20     | 0.63       | 3.51    | 0.00     |  |
| quadratic : cond_c            | -3.34    | 0.66       | -5.08   | 0.00     |  |
| cubic : cond_c                | -2.59    | 0.65       | -4.01   | 0.00     |  |
| quartic : cond_c              | 0.76     | 0.60       | 1.27    | 0.20     |  |
| d' : cond_c                   | 0.17     | 0.02       | 8.82    | 0.00     |  |
| linear : group_CI             | -1.92    | 17.11      | -0.11   | 0.91     |  |
| quadratic : group_CI          | 2.41     | 10.11      | 0.24    | 0.81     |  |
| cubic : group_CI              | 4.51     | 8.86       | 0.51    | 0.61     |  |
| quartic : group_CI            | -1.50    | 4.63       | -0.32   | 0.75     |  |
| cond_c : group_CI             | 0.25     | 0.05       | 4.66    | 0.00     |  |
| linear : d' : cond_c          | 1.30     | 0.37       | 3.53    | 0.00     |  |
| quadratic : d' : cond_c       | 2.54     | 0.37       | 6.77    | 0.00     |  |
| cubic : d' : cond_c           | 2.11     | 0.37       | 5.68    | 0.00     |  |
| quartic : d' : cond_c         | 0.28     | 0.35       | 0.79    | 0.43     |  |
| linear : cond_c : group_CI    | -4.28    | 1.01       | -4.24   | 0.00     |  |
| quadratic : cond_c : group_CI | 5.97     | 1.05       | 5.72    | 0.00     |  |
| cubic : cond_c : group_CI     | 5.82     | 1.03       | 5.63    | 0.00     |  |
| quartic : cond_c : group_CI   | 3.43     | 0.99       | 3.48    | 0.00     |  |

| Random Effects      |              |          |          |
|---------------------|--------------|----------|----------|
| Groups              | Name         | Variance | Std.Dev. |
| Participant         | (Intercept)  | 1.429    | 1.195    |
|                     | linear       | 461.086  | 21.473   |
|                     | quadratic    | 159.812  | 12.642   |
|                     | cubic        | 122.728  | 11.078   |
|                     | quartic      | 33.026   | 5.747    |
| Observations        | 525,635      |          |          |
| Log Likelihood      | −119,043.800 |          |          |
| Akaike Inf. Crit.   | 238,177.500  |          |          |
| Bayesian Inf. Crit. | 238,680.300  |          |          |
